# Supplementary material for: Fluorescent reporters for functional analysis in rice leaves
Source: PubMed Central journal article supplement (PMC7011658; doi:10.1002/pld3.188), 2020-02-11
Supplement: PLD3-4-e00188-s001.pdf [file PLD3-4-e00188-s001.pdf]

## **Fluorescent reporters for functional analysis in rice leaves**

**Leonie H. Luginbuehl<sup>†</sup>, Sherif El-Sharnouby<sup>†</sup>, Na Wang, and Julian M. Hibberd<sup>\*</sup>**

Department of Plant Sciences, University of Cambridge, Downing Street, Cambridge CB2 3EA, United Kingdom.

<sup>†</sup>These authors contributed equally to this work.

<sup>\*</sup>Corresponding author.

LHL - [lh128@cam.ac.uk](mailto:lh128@cam.ac.uk)

SE - [se266@cam.ac.uk](mailto:se266@cam.ac.uk)

NW - [nw375@cam.ac.uk](mailto:nw375@cam.ac.uk)

JMH - [jmh65@cam.ac.uk](mailto:jmh65@cam.ac.uk)

### **Supplemental File 1**

Supplemental File 1 contains five supplemental figures and one supplemental table.

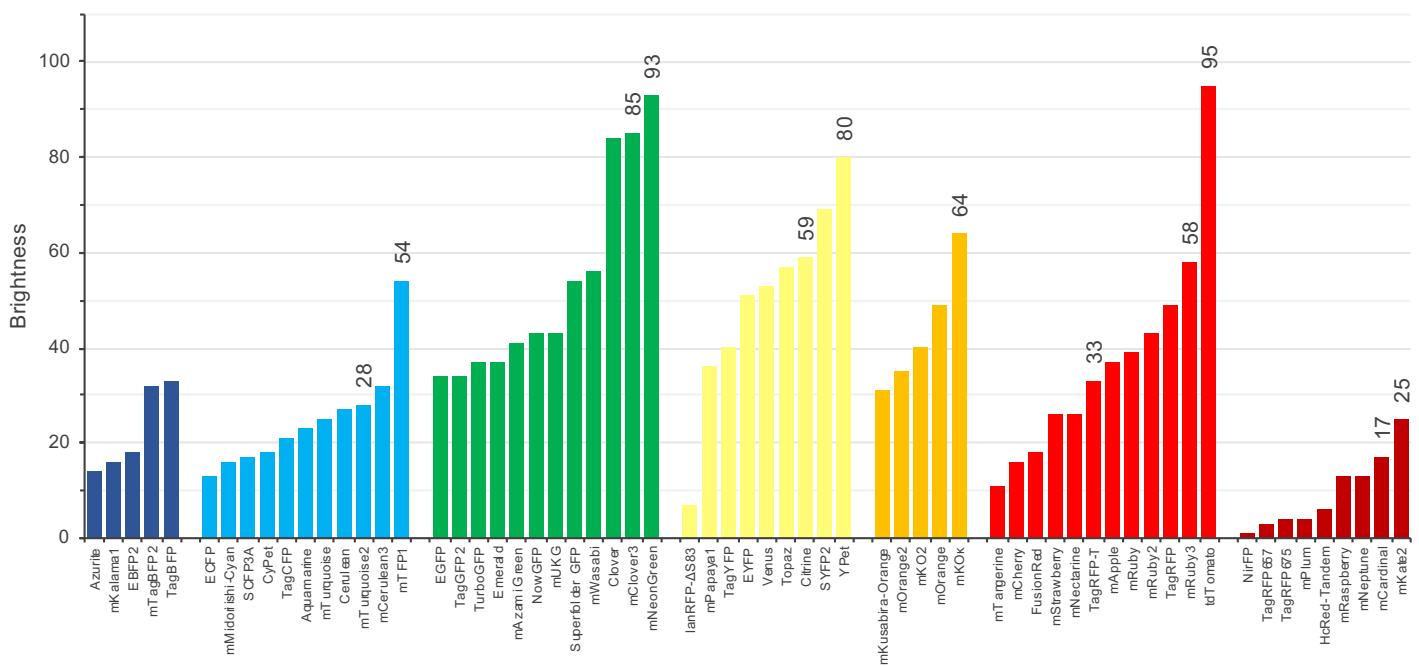

**Supplemental Figure 1: Fluorescent proteins chosen as candidate reporters to test in rice.**

The twelve fluorescent proteins selected for screening are annotated with a value representing their brightness (product of extinction coefficient and quantum yield). From left to right: blue, cyan, green, yellow, orange, red and far red fluorescent proteins. The displayed set of proteins was obtained from (<http://www.fpviz.org/FP.html>), except for tdTomato, which was missing from the database.

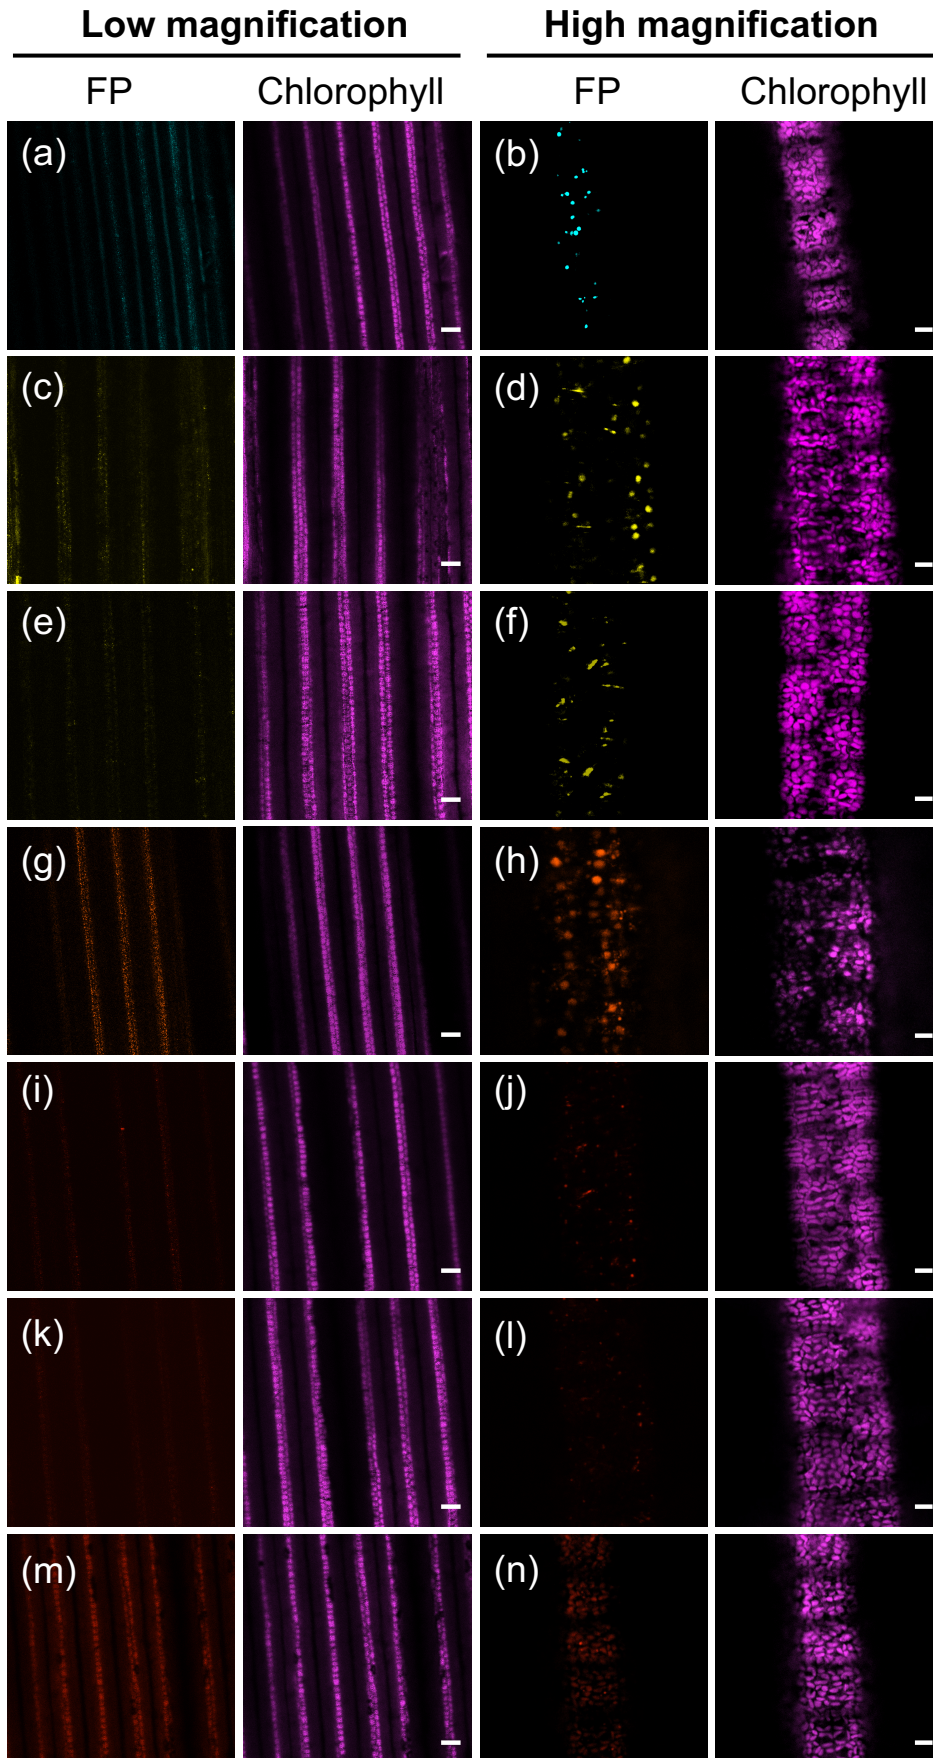

**Supplemental Figure 2: Undetectable and poorly detectable fluorescent proteins expressed in mesophyll cells of rice leaf blades from stably transformed  $T_0$  plants.** (a,b) Leaves expressing  $ZmPEPC_{pro}:mTFP1-NLS$ . (c,d) Leaves expressing  $ZmPEPC_{pro}:mCitrine-NLS$ . (e,f) Leaves expressing  $ZmPEPC_{pro}:mYPet-NLS$ . (g,h) Leaves expressing  $ZmPEPC_{pro}:mTagRFPT-NLS$ . (i,j) Leaves expressing  $ZmPEPC_{pro}:mRuby3-NLS$ . (k,l) Leaves expressing  $ZmPEPC_{pro}:mKate2-NLS$ . (m,n) Leaves expressing  $ZmPEPC_{pro}:mCardinal-NLS$ . FP; fluorescent protein. Scale bars represent 100  $\mu m$  and 10  $\mu m$  for low and high magnification images, respectively.

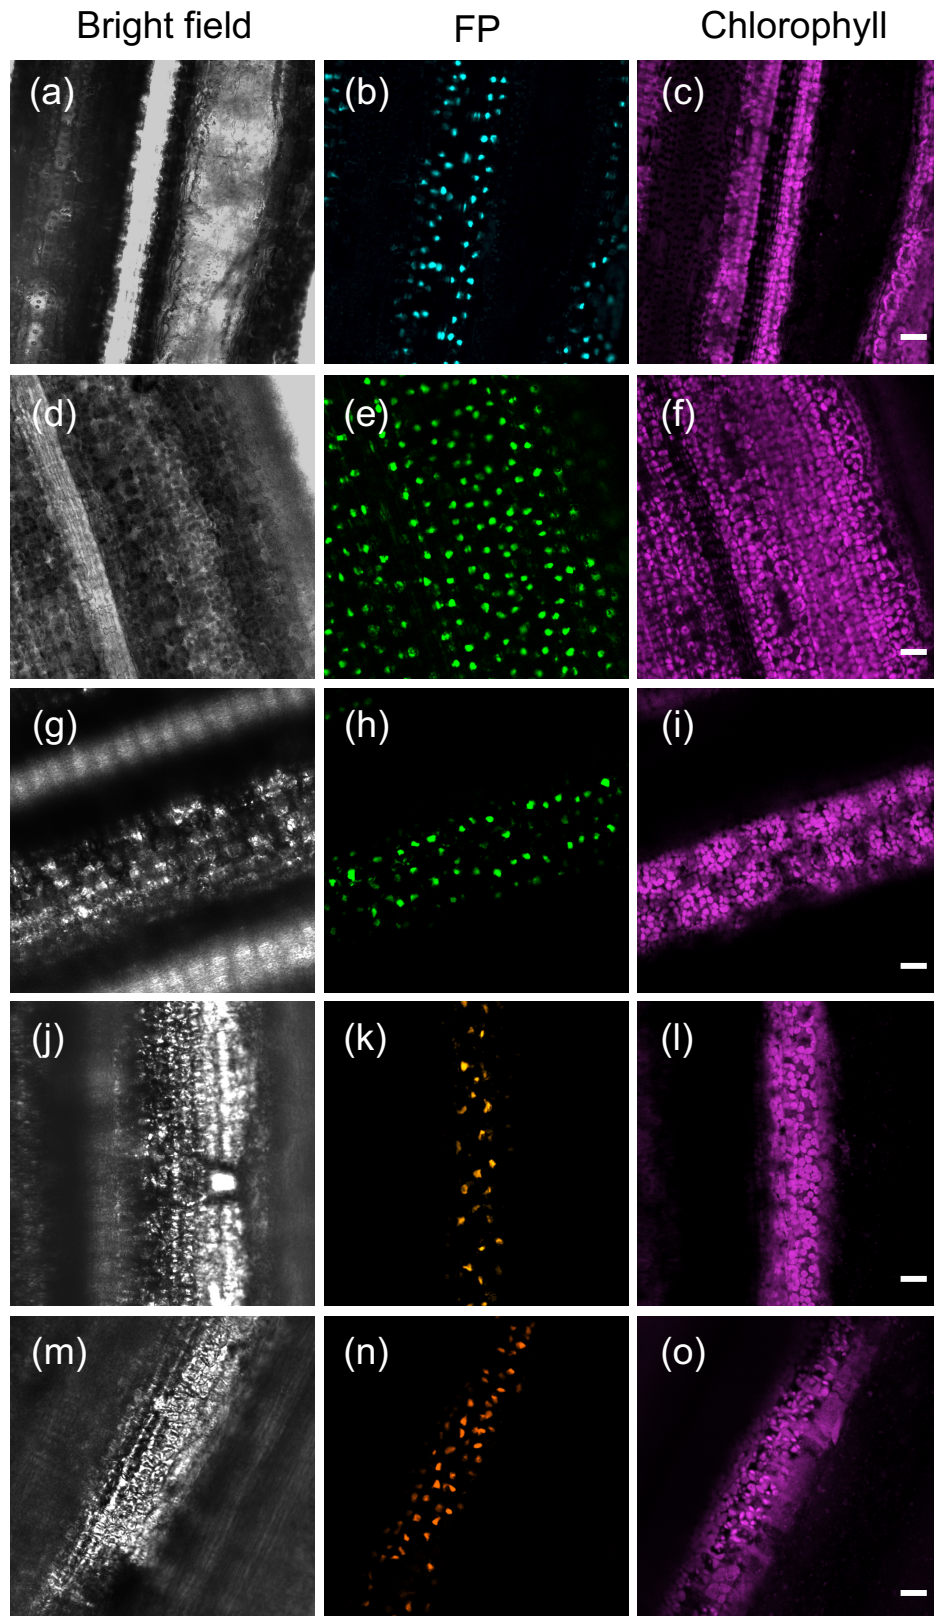

**Supplemental Figure 3: Fluorescent proteins expressed in mesophyll cells of rice leaf blades from stably transformed  $T_1$  plants.** (a-c) Leaves expressing *ZmPEPC<sub>pro</sub>:mTurquoise2-NLS*. (d-f) Leaves expressing *ZmPEPC<sub>pro</sub>:mNeonGreen-NLS*. (g-i) Leaves expressing *ZmPEPC<sub>pro</sub>:mClover3-NLS*. (j-l) Leaves expressing *ZmPEPC<sub>pro</sub>:mKOK-NLS*. (m-o) Leaves expressing *ZmPEPC<sub>pro</sub>:tdTomato-NLS*. FP; fluorescent protein. Scale bars represent 20  $\mu\text{m}$ .

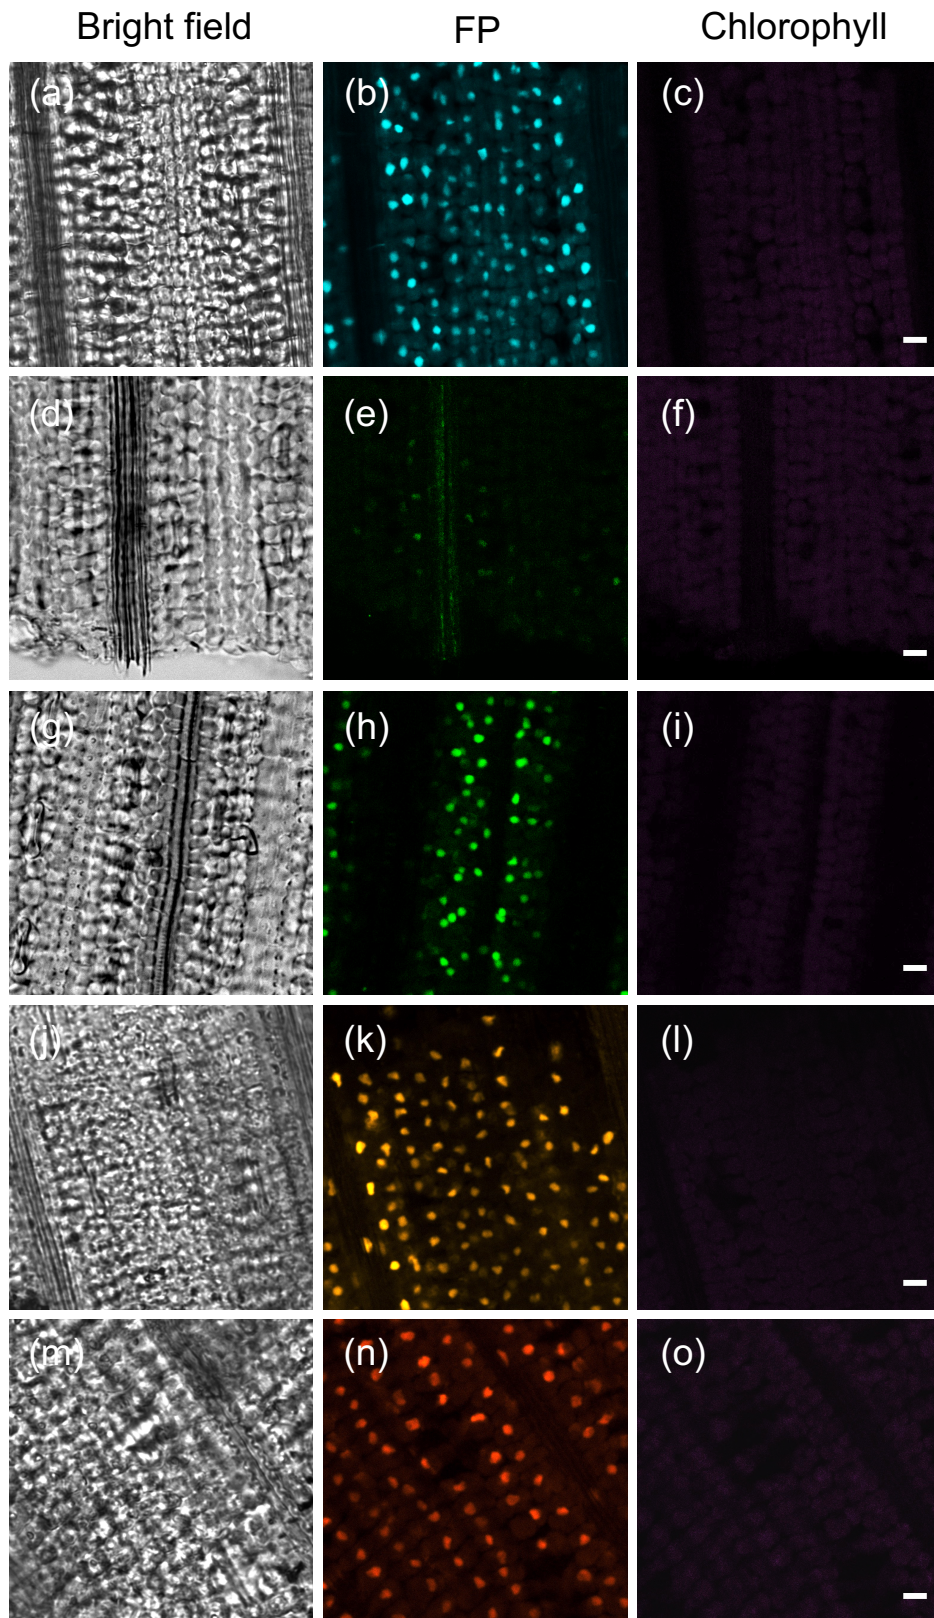

**Supplemental Figure 4: Fluorescent proteins expressed in mesophyll cells of ClearSee-treated rice leaf blades from stably transformed plants.** (a-c) Leaves expressing *ZmPEPC<sub>pro</sub>:mTurquoise2-NLS*. (d-f) Leaves expressing *ZmPEPC<sub>pro</sub>:mNeonGreen-NLS*. (g-i) Leaves expressing *ZmPEPC<sub>pro</sub>:mClover3-NLS*. (j-l) Leaves expressing *ZmPEPC<sub>pro</sub>:mKOK-NLS*. (m-o) Leaves expressing *ZmPEPC<sub>pro</sub>:tdTomato-NLS*. FP; fluorescent protein. Scale bars represent 10  $\mu$ m.

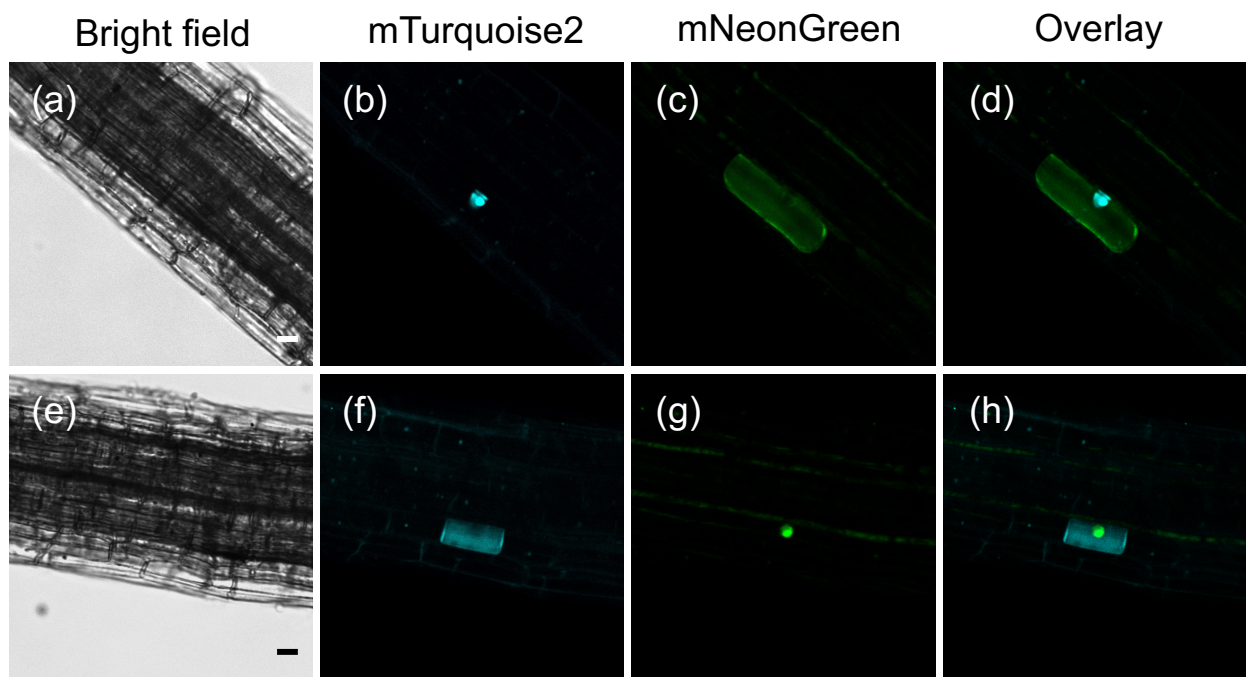

**Supplemental Figure 5: Fluorescent proteins targeted to different cell compartments in transiently transformed rice root cells.** (a-d) Root cell transformed with a construct expressing nuclear-localized mTurquoise2 and plasma membrane-localized mNeonGreen. (e-h) Root cell transformed with a construct expressing plasma membrane-localized mTurquoise2 and nuclear-localized mNeonGreen. Scale bars represent 10  $\mu\text{m}$ .

**Supplemental Table 2: Screen of stably transformed T<sub>0</sub> plants expressing different fluorescent proteins.** Numbers indicate independent T<sub>0</sub> plants for each fluorescent protein where nuclear fluorescence signal was or was not detected.

| Reporter    | Nuclear signal detected | Not detected | Notes                                                                                       |
|-------------|-------------------------|--------------|---------------------------------------------------------------------------------------------|
| mTurquoise2 | 5 strong / 3 weak       | 1            | Clear nuclear signal, relatively little signal from autofluorescent structures              |
| mNeonGreen  | 5 strong / 4 weak       | 0            |                                                                                             |
| mClover3    | 7 strong                | 2            | Clear nuclear signal, substantial signal from autofluorescent structures                    |
| mKOκ        | 7 strong                | 0            |                                                                                             |
| tdTomato    | 4 strong / 3 weak       | 0            |                                                                                             |
| TagRFP-T    | 3 strong / 3 weak       | 0            | Non-robust nuclear signal, substantial signal from autofluorescent structures               |
| mCitrine    | 2 weak                  | 3            | Weak nuclear signal for very few plants, substantial signal from autofluorescent structures |
| mYPet       | 1 weak                  | 4            |                                                                                             |
| mTFP1       | none detected           | 6            |                                                                                             |
| mRuby3      | none detected           | 7            | No nuclear signal detected, autofluorescence signal present                                 |
| mKate2      | none detected           | 7            |                                                                                             |
| mCardinal   | none detected           | 5            |                                                                                             |
